# Supplementary material for: Deciphering Active Prophages from Metagenomes
Source: PubMed Central journal article supplement (PMC9040807; doi:10.1128/msystems.00084-22), 2022-03-24

Coverages | Prophage (green) | Host (purple) | Values | Cohen's  $d$  (blue) | Prophage:host ratio (orange)

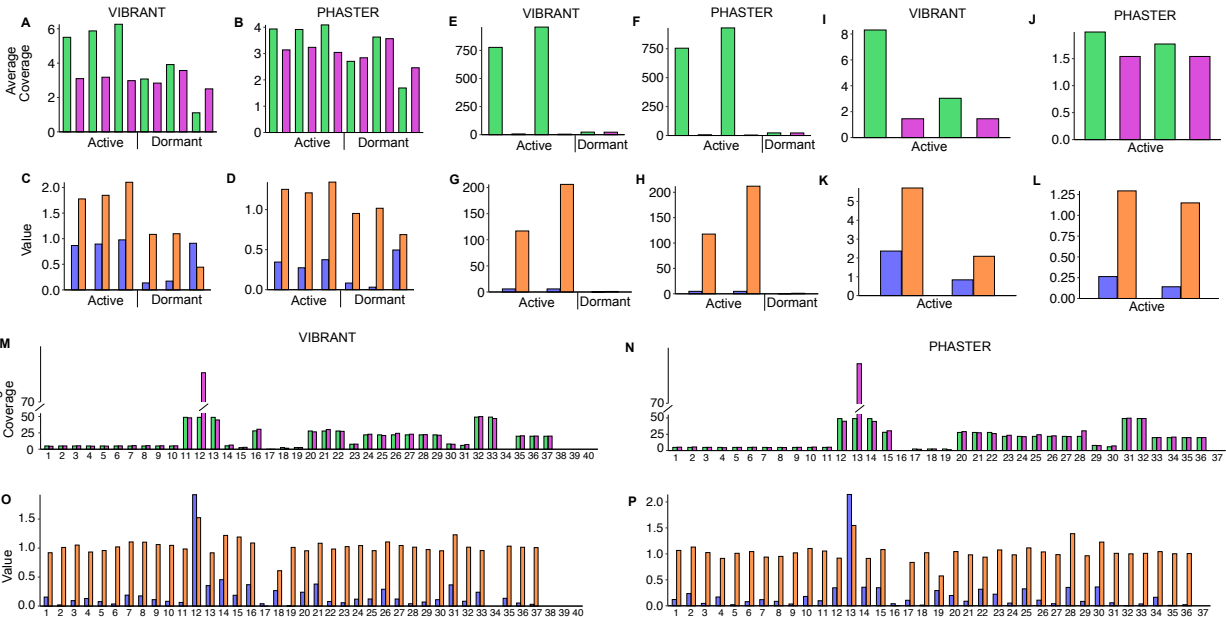

Supplement: msystems.00084-22-sf001.pdf [file msystems.00084-22-sf001.pdf]
