# Supplementary material for: Deciphering Active Prophages from Metagenomes
Source: PubMed Central journal article supplement (PMC9040807; doi:10.1128/msystems.00084-22), 2022-03-24
Supplement: msystems.00084-22-sf003.pdf [file msystems.00084-22-sf003.pdf]

**A**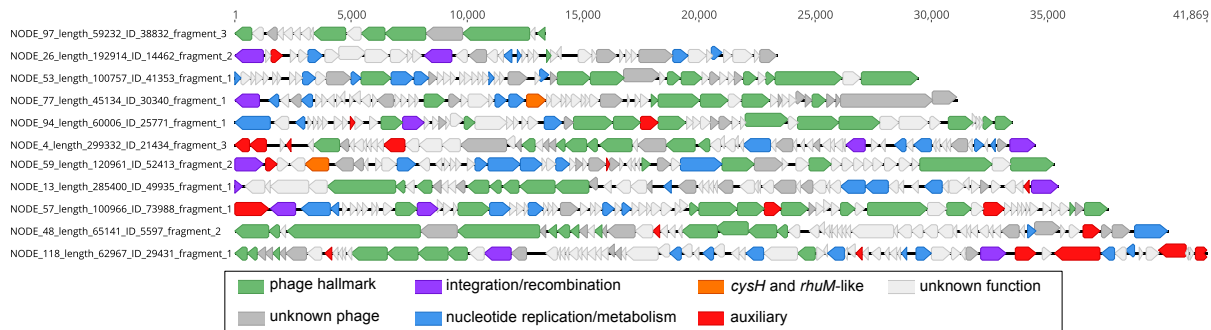**B**

|                                                              |   |   |   |   |   |   |   |   |   |   |   |   |   |   |   |   |   |   |   |   |   |   |
|--------------------------------------------------------------|---|---|---|---|---|---|---|---|---|---|---|---|---|---|---|---|---|---|---|---|---|---|
| NODE_138_length_47685_ID_33030_fragment_1 (bases 1 to 37595) | A | A | T | A | T | A | T | T | C | A | A | A | A | T | G | G | A | T | T | T | A | C |
| NODE_57_length_100966_ID_73988_fragment_1 (bases 1 to 37594) | A | A | T | A | T | A | T | T | C | A | A | A | A | T | G | G | A | T | T | T | A | C |
| NODE_109_length_51087_ID_36721_fragment_1 (bases 1 to 26704) | A | A | T | A | T | A | T | T | C | A | A | A | A | T | G | G | A | T | T | T | A | C |
| NODE_96_length_75502_ID_39016_fragment_1 (bases 1 to 37594)  | A | A | T | A | T | A | T | T | C | A | C | A | A | T | G | G | A | T | T | T | A | C |
| NODE_97_length_59232_ID_38832_fragment_3 (bases 1 to 13352)  | T | A | A | A | T | A | T | C | G | C | A | - | - | C | C | C | C | C | C | C | C | G |
| NODE_173_length_58692_ID_47763_fragment_3 (bases 1 to 13354) | T | A | A | A | T | A | T | C | G | C | A | C | C | C | C | C | C | C | C | C | C | G |
| NODE_320_length_24760_ID_37649_fragment_1 (bases 13353 to 1) | T | A | A | A | T | A | T | C | G | C | A | - | - | C | C | C | C | C | C | C | C | G |
| NODE_145_length_54533_ID_13483_fragment_1 (bases 13353 to 1) | T | A | A | A | T | A | T | C | G | C | A | - | - | C | C | C | C | C | C | C | C | G |
| NODE_13_length_285400_ID_49935_fragment_1 (bases 1 to 35477) | C | A | T | T | C | G | G | A | A | T | - | - | C | C | C | C | C | C | C | C | G | T |
| NODE_15_length_157152_ID_25224_fragment_1 (bases 1 to 35478) | C | A | T | T | C | G | G | A | A | T | - | - | C | C | C | C | C | C | C | C | C | T |
| NODE_70_length_87455_ID_3304_fragment_1 (bases 1 to 35477)   | C | A | T | T | C | G | G | A | A | T | - | - | C | C | C | C | C | C | C | C | C | T |
| NODE_59_length_87456_ID_36471_fragment_1 (bases 1 to 35478)  | C | A | T | T | C | G | G | A | A | T | C | C | C | C | C | C | C | C | C | C | C | T |
| NODE_306_length_28053_ID_26897 (bases 28051 to 3)            | G | G | A | G | G | C | T | C | T | C | A | G | A | C | A | C | T | T | A | A | A | C |
| NODE_547_length_15001_ID_32871 (bases 3 to 14999)            | G | G | A | G | G | A | T | C | T | C | A | G | A | C | A | C | T | T | A | A | A | C |
| NODE_48_length_65141_ID_5597_fragment_2 (bases 181 to 28229) | G | G | A | G | G | C | T | C | T | C | A | G | A | C | A | C | T | T | A | A | A | C |
| NODE_2419_length_7030_ID_21769 (bases 7028 to 3)             | G | G | A | G | G | C | T | C | T | C | A | G | A | C | A | C | T | T | A | A | A | C |
| NODE_286_length_44956_ID_41996_fragment_1 (bases 1 to 31087) | T | T | A | A | A | G | T | T | A | G | T | A | G | T | T | A | G | C | A | C | C | C |
| NODE_77_length_45134_ID_30340_fragment_1 (bases 1 to 31087)  | T | T | A | A | A | A | G | T | T | A | G | T | A | G | T | T | A | G | C | A | C | C |
| NODE_165_length_44831_ID_43666_fragment_1 (bases 30784 to 3) | T | T | A | A | A | A | G | T | T | A | G | C | A | G | T | T | A | G | C | A | C | C |
| NODE_146_length_44956_ID_72065_fragment_1 (bases 1 to 31087) | T | T | A | A | A | A | G | T | T | A | G | T | A | G | T | T | A | G | C | A | C | C |
| NODE_26_length_192914_ID_14462_fragment_2 (bases 1 to 23284) | T | A | G | G | A | G | C | G | A | G | A | A | A | A | A | G | A | G | A | G | A | G |
| NODE_32_length_101899_ID_28470_fragment_2 (bases 1 to 23270) | T | A | G | G | A | G | C | G | A | G | A | A | A | A | A | G | A | G | A | G | A | G |
| NODE_490_length_13524_ID_3643_fragment_2 (bases 3 to 1352)   | T | A | G | G | A | G | C | G | A | G | A | A | A | A | A | G | A | G | A | G | A | G |
| NODE_11_length_192880_ID_70413_fragment_2 (bases 1 to 23284) | T | A | G | G | A | G | C | G | A | G | A | A | A | A | A | G | A | G | A | G | A | G |
