# Supplementary material for: Deciphering Active Prophages from Metagenomes
Source: PubMed Central journal article supplement (PMC9040807; doi:10.1128/msystems.00084-22), 2022-03-24

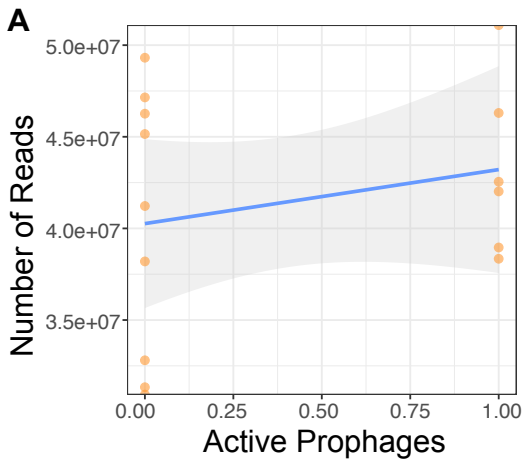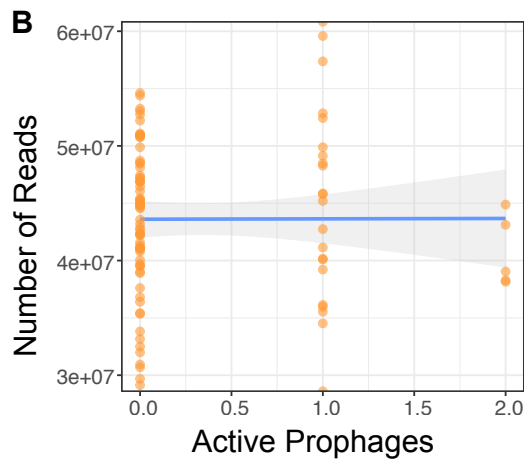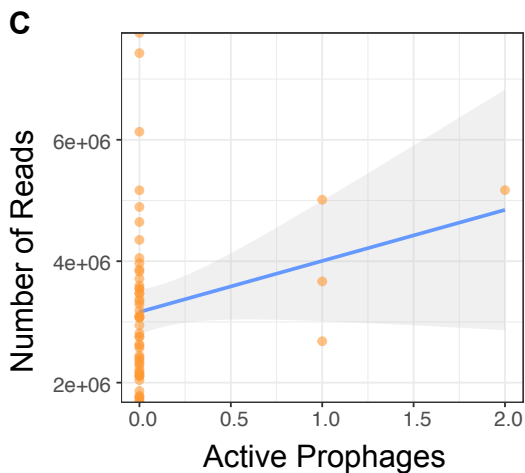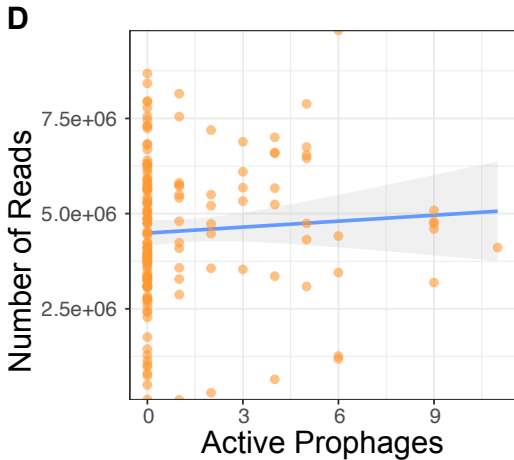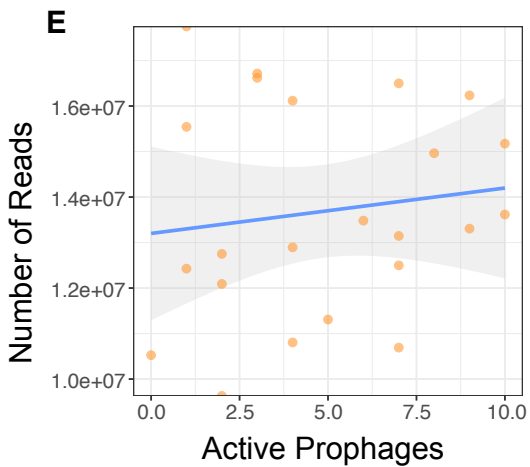

Supplement: msystems.00084-22-sf004.pdf [file msystems.00084-22-sf004.pdf]
