# Supplementary material for: Deciphering Active Prophages from Metagenomes
Source: PubMed Central journal article supplement (PMC9040807; doi:10.1128/msystems.00084-22), 2022-03-24
Supplement: reviewer-comments.pdf [file reviewer-comments.pdf]

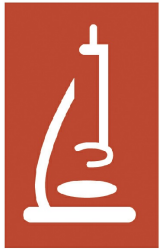

AMERICAN  
SOCIETY FOR  
MICROBIOLOGY

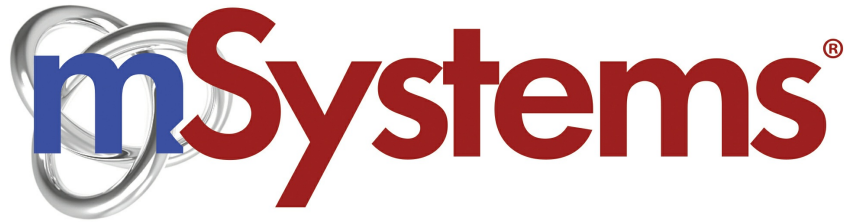

## Deciphering active prophages from metagenomes

Kristopher Kieft and Karthik Anantharaman

*Corresponding Author(s): Karthik Anantharaman, University of Wisconsin-Madison*

---

### Review Timeline:

Submission Date:

January 28, 2022

Accepted:

March 7, 2022

---

*Editor: Robert Beiko*

*Reviewer(s): The reviewers have opted to remain anonymous.*

### Transaction Report:

(Note: With the exception of the correction of typographical or spelling errors that could be a source of ambiguity, letters and reports are not edited. The original formatting of letters and referee reports may not be reflected in this compilation.)

**DOI:** <https://doi.org/10.1128/msystems.00084-22>

March 7, 2022

Dr. Karthik Anantharaman  
University of Wisconsin-Madison  
Bacteriology  
1550 Linden Dr  
4550 Microbial Sciences Building  
Madison, Wisconsin 53705

Re: mSystems00084-22 (Deciphering active prophages from metagenomes)

Dear Dr. Karthik Anantharaman:

Your manuscript has been accepted, and I am forwarding it to the ASM Journals Department for publication. For your reference, ASM Journals' address is given below. Before it can be scheduled for publication, your manuscript will be checked by the mSystems production staff to make sure that all elements meet the technical requirements for publication. They will contact you if anything needs to be revised before copyediting and production can begin. Otherwise, you will be notified when your proofs are ready to be viewed.

Corrections:

-----  
Lines 272-273: "One prophage from each VIBRANT and PHASTER had an  
273 effect sizes greater than 1.75" -> "One prophage from each of VIBRANT and PHASTER had effect sizes greater than 1.75"  
L357: "Nucleotide"

There are issues with some of the figure legends: Figures 3-5 have grayscale legends but coloured figure elements, while the shades in Figure 4 are difficult / impossible to differentiate.

ASM policy requires that data be available to the public upon online posting of the article, so please verify all links to sequence records, if present, and make sure that each number retrieves the full record of the data. If a new accession number is not linked or a link is broken, provide production staff with the correct URL for the record. If the accession numbers for new data are not publicly accessible before the expected online posting of the article, publication of your article may be delayed; please contact the ASM production staff immediately with the expected release date.

As an open-access publication, mSystems receives no financial support from paid subscriptions and depends on authors' prompt payment of publication fees as soon as their articles are accepted.

**Publication Fees:**

You will be contacted separately about payment when the proofs are issued; please follow the instructions in that e-mail. Arrangements for payment must be made before your article is published. For a complete list of **Publication Fees**, including supplemental material costs, please visit our [website](#).

Corresponding authors may [join or renew ASM membership](#) to obtain discounts on publication fees. Need to upgrade your membership level? Please contact Customer Service at [Service@asmusa.org](mailto:Service@asmusa.org).

**For mSystems research articles**, you are welcome to submit a short author video for your recently accepted paper. Videos are normally 1 minute long and are a great opportunity for junior authors to get greater exposure. Importantly, this video will not hold up the publication of your paper, and you can submit it at any time.

Details of the video are:

- Minimum resolution of 1280 x 720
- .mov or .mp4. video format
- Provide video in the highest quality possible, but do not exceed 1080p
- Provide a still/profile picture that is 640 (w) x 720 (h) max
- Provide the script that was used

We recognize that the video files can become quite large, and so to avoid quality loss ASM suggests sending the video file via <https://www.wetransfer.com/>. When you have a final version of the video and the still ready to share, please send it to mSystems staff at [mssystemsjournal@msubmit.net](mailto:mssystemsjournal@msubmit.net).

**For mSystems research articles**, if you would like to submit an image for consideration as the Featured Image for an issue, please contact mSystems staff at [mjournal@msubmit.net](mailto:mjournal@msubmit.net).

Thank you for submitting your paper to mSystems.

Sincerely,

Robert Beiko  
Editor, mSystems

Journals Department  
American Society for Microbiology  
1752 N St., NW  
Washington, DC 20036  
E-mail: [peerreview@asmusa.org](mailto:peerreview@asmusa.org)  
Phone: (202) 737-3600

Fig. S3: Accept  
Table S3: Accept  
Fig. S4: Accept  
Table S4: Accept  
Table S6: Accept  
Fig. S1: Accept  
Table S1: Accept  
Table S5: Accept  
Table S2: Accept  
Fig. S2: Accept
